# Supplementary material for: Portable and benchtop Raman spectrometers coupled to cluster analysis to identify quinine sulfate polymorphs in solid dosage forms and antimalarial drug quantification in solution by AuNPs-SERS with MCR-ALS
Source: Royal Society of Chemistry journal article supplement (doi:10.1039/d0ay00693a), 2020-01-01
Supplement: d0ay00693a1.pdf [file d0ay00693a1.pdf]

**Portable and benchtop Raman spectrometers coupled to cluster analysis to identify quinine sulfate polymorphs in solid dosage forms and antimalarial drug quantification in solution by AuNPs-SERS with MCR-ALS**

**Supplementary material**

Sarmiento J. Mazivila <sup>a,\*</sup>, Helena I.S. Nogueira <sup>b</sup>, Ricardo N.M.J. Páscoa <sup>c</sup>, David S.M. Ribeiro <sup>c</sup>, João L.M. Santos <sup>c</sup>, João M.M. Leitão <sup>d</sup>, Joaquim C.G. Esteves da Silva <sup>a,\*</sup>

<sup>a</sup> Research Centre in Chemistry (CIQ-UP), Faculty of Sciences, University of Porto, 4169-007 Porto, Portugal.

<sup>b</sup> Department of Chemistry and CICECO, University of Aveiro, 3810-193 Aveiro, Portugal.

<sup>c</sup> LAQV, REQUIMTE, Laboratory of Applied Chemistry, Department of Chemical Sciences, Faculty of Pharmacy, University of Porto, 4050-313 Porto, Portugal.

<sup>d</sup> Research Centre in Chemistry (CIQ-UP), Faculty of Pharmacy, University of Coimbra, 3000-548 Coimbra, Portugal.

**\*Corresponding authors at:** Centro de Investigação em Química da Universidade do Porto (CIQ-UP), Faculty of Sciences, University of Porto. R. Campo Alegre 687, 4169-007 Porto, Portugal. *E-mail addresses:* mazivilasarmientojunior@yahoo.com.br, sarmiento.mazivila@fc.up.pt (S.J. Mazivila), jcsilva@fc.up.pt (J.C.G. Esteves da Silva).

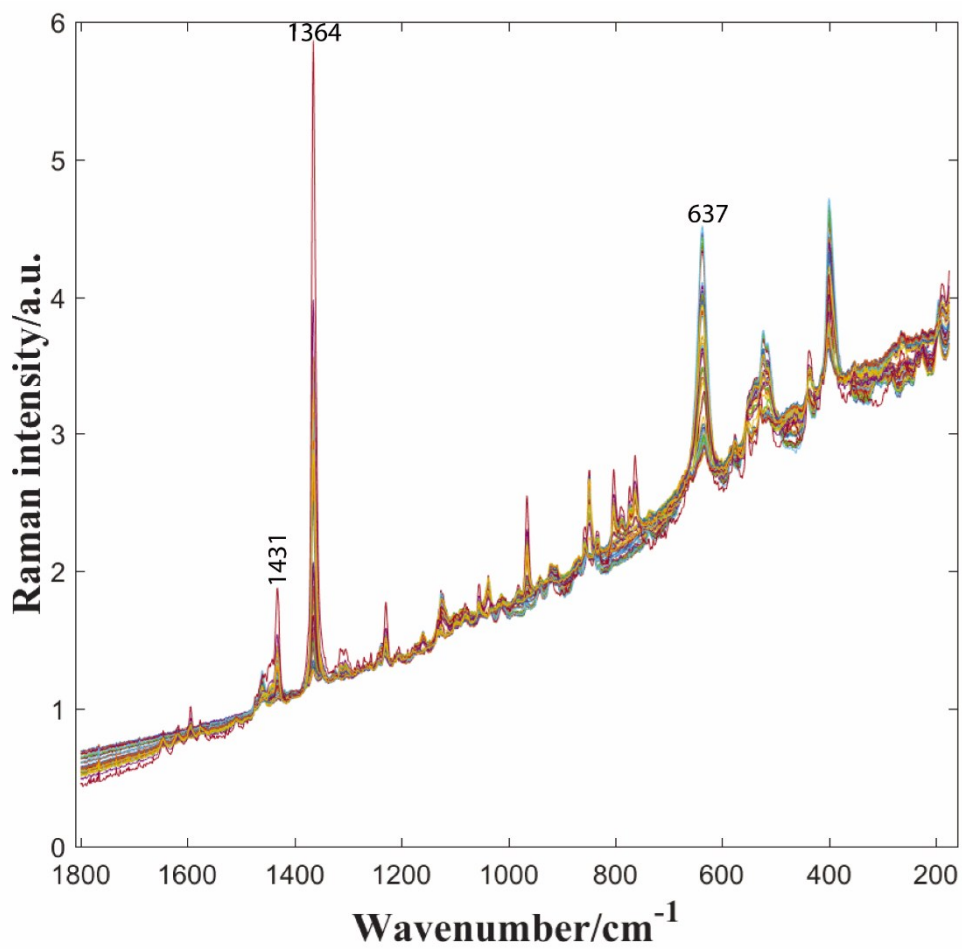

**Fig. S1.** Raman spectra of 80 commercial quinine sulfate solid dosage forms collected by a portable backscattering Raman spectrometer with excitation laser of 785 nm.

**Table S1.** MCR-ALS model with concentration correlation constraint on component 2 (quinine sulfate).

**Known concentration (C\_known) for component 2 in the system (quinine sulfate) used during the concentration correlation constraint on concentration direction, because the first three samples are related to calibration set while sample number four is related to a test sample:**

Nan 150.00

Nan 175.00

Nan 200.00

Nan Nan

After the alternating least-squares (ALS) optimization achieves convergence, under application of the various restrictions, the MCR-ALS model reports (output) the concentration and spectra profile as 'copt' and 'sopt', respectively. NaN (Not-a-Number) is the Matlab notation for missing values.

Then, in order to assessment the prediction capacity of the model the authors employed the following commands in Matlab:

```
%Analytical Chemistry  
  
Figure  
  
plot(C_known_2(1:3,2),copt(1:3,2),'-o')  
slope=pinv(C_known_2(1:3,2))*copt(1:3,2)  
ypred=copt(4,2)/slope  
xc=C_known_2(1:3,2);  
yc=copt(1:3,2);  
CC=corrcoef([xc yc]),R2=CC(1,2)  
load C_test_1.txt%containing nominal concentration for test sample  
number 1 as: 180.00 ng mL-1  
ytest=C_test_1
```
